# Supplementary material for: Expression of dynein, cytoplasmic 2, heavy chain 1 (DHC2) associated with glioblastoma cell resistance to temozolomide
Source: PubMed Central journal article supplement (PMC4931463; doi:10.1038/srep28948), 2016-07-04

**Expression of dynein, cytoplasmic 2, heavy chain 1 (DHC2) associated with glioblastoma cell resistance to temozolomide**

**Running title:** DHC2 and TMZ resistance in glioblastoma cells

Hai Wang<sup>1,\*</sup>, Wenfeng Feng<sup>1,\*</sup>, Yuntao Lu<sup>1,\*</sup>, Hezhen Li<sup>1</sup>, Wei Xiang<sup>1</sup>, Ziyang Chen<sup>1</sup>,  
Minyi He<sup>2</sup>, Liang Zhao<sup>3</sup>, Xuegang Sun<sup>4</sup>, Bingxi Lei<sup>1</sup>, Songtao Qi<sup>1</sup>, Yawei Liu<sup>1,5</sup>

<sup>1</sup>Department of Neurosurgery, Nanfang Glioma Center, Nanfang Hospital, Southern Medical University, Guangzhou 510515, China

<sup>2</sup>Department of Organ Transplantation, Zhujiang Hospital, Southern Medical University, Guangzhou 510515, China

<sup>3</sup>Department of Pathology, Nanfang Hospital, Southern Medical University, Guangzhou 510515, China.

<sup>4</sup>School of Traditional Chinese Medicine, Southern Medical University, Guangzhou 510515, China

<sup>5</sup>Nanfang Neurosurgery Research Institution, Nanfang hospital, Southern Medical University, Guangzhou 510515, China

\*These authors contributed equally to this work.

**Corresponding author:** Prof. Songtao Qi or Yawei Liu, Department of Neurosurgery,

Nanfang Glioma Center, Nanfang Hospital, Southern Medical University, Guangzhou

Dadaobei, Guangzhou 510515, China; Tel.: 86-020-61641801; Fax: 86-020-61641801;

Email: qisongtaonfyy@126.com for SQ or Tel.: 86-020-61641806; Fax:

86-020-61641806; Email: limpduck@163.com for YL.

Supplemental Tables

Table S1. Primers/siRNA sequences

| Gene                      | Sequence                         | Purpose |
|---------------------------|----------------------------------|---------|
| GAPDH                     | 5'-ATCATCAGCAATGCCTCCTG-3'       | qPCR    |
|                           | 5'-ATGGACTGTGGTCATGAGTC-3'       |         |
| DHC2                      | 5'-TGCTGGTGTTCCTCAAGCTG-3'       | qPCR    |
|                           | 5'-TTCTGCTCCATTCCTGATCC-3'       |         |
| KIF2B                     | 5'-GGGAAGTGGGAAGACGTACA-3'       | qPCR    |
|                           | 5'-GATTTGCTGATTGCCATCCT-3'       |         |
| DHC2 siRNA                | (1) 5'-ACAGGCUCUCUCUGAATT-3'     | siRNA   |
|                           | (2) 5'-GGAAUUGAAUACUCUUCAATT-3'  |         |
| KIF2B siRNA               | (1) 5'-CGGCCCAAGAUUGUUCUAATT-3'  | siRNA   |
|                           | (2) 5'-GUGGAGUACACCAUGAUUAUTT-3' |         |
| Negative control<br>siRNA | 5'-UUCUCCGAACGUGUCACGUTT-3'      | siRNA   |

Table S2. Upregulated expression of proteins in U87 cells after TMZ treatment

| <b>Protein</b>                                                                 | <b>Accession number</b> | <b>Gene name</b> | <b>MW</b> | <b>PI</b> |
|--------------------------------------------------------------------------------|-------------------------|------------------|-----------|-----------|
| BRCA1 associated RING domain 1 variant                                         | Q3B891                  | BRCA1            | 53350.61  | 5.62      |
| Spectrin, alpha, erythrocytic 1                                                | D3DVD8                  | SPTA1            | 178905.85 | 4.67      |
| Microtubule-actin cross-linking factor 1, isoforms 1/2/3/5                     | Q6IPG6                  | MACF1            | 609179.65 | 5.06      |
| Vimentin                                                                       | P08670                  | VIM              | 53676.1   | 4.77      |
| cDNA FLJ55253, highly similar to Actin, cytoplasmic 1                          | B4E3A4                  |                  | 40115.87  | 5.05      |
| 40S ribosomal protein SA (Fragment)                                            | C9J9K3                  | RPSA             | 29601.04  | 4.91      |
| cDNA FLJ53902, highly similar to Homo sapiens kinesin family member 2B (KIF2B) | B4DY48                  | KIF2B            | 63984.93  | 9.12      |
| ATP synthase subunit beta (Fragment)                                           | Q0QEN7                  | ATP5B            | 48083.04  | 4.7       |
| Mitochondrial dynamin-like 120 kDa protein                                     | E5KLM2                  | OPA1             | 11165     | 7.87      |
| Putative uncharacterized protein DKFZp781G125                                  | Q68CP7                  | DKFZp781G125     | 135753.44 | 6.55      |
| Cytoplasmic dynein 2 heavy chain 1                                             | Q8NCM8                  | DYNC2H1          | 495789.75 | 6.5       |
| Myosin-14                                                                      | F2Z2U8                  | MYH14            | 232101    | 5.3       |
| Glutamine-dependent NAD(+) synthetase (Fragment)                               | H0YCQ6                  | NADSYN1          | 29910     | 6.61      |
| Poly [ADP-ribose] polymerase 14                                                | Q460N5                  | PARP14           | 202800.21 | 6.81      |
| ZNF557 protein (Fragment)                                                      | Q4G137                  | ZNF557           | 47290.17  | 9.53      |
| GRIP and coiled-coil domain-containing protein 2                               | Q8IWJ2                  | GCC2             | 196872.12 | 4.81      |
| PAPOLG protein (Fragment)                                                      | Q2TAI9                  | PAPOLG           | 58357.31  | 8.55      |
| Testis-specific gene 10 protein (Fragment)                                     | B2R8F9                  | TSGA10           | 202800.21 | 6.81      |
| Tubulin alpha-1B chain                                                         | P68363                  | TUBA1B           | 50803.86  | 4.7       |
| Actin, cytoplasmic 1                                                           | P60709                  | ACTB             | 42051.86  | 5.15      |
| N-acetylated-alpha-linked acidic dipeptidase 2                                 | J3KNJ3                  | NAALAD2          | 80284.35  | 8.67      |

|                                                                                  |        |         |           |      |
|----------------------------------------------------------------------------------|--------|---------|-----------|------|
| ZNF234                                                                           | Q86WM3 | ZNF234  | 16555.82  | 6.92 |
| Multidrug resistance-associated protein 1                                        | I3L4X2 | ABCC1   | 161588.05 | 6.72 |
| Ropporin-1B                                                                      | D6RA85 | ROPN1B  | 11799.2   | 5.89 |
| PRO1975                                                                          | Q9UHS8 | PRO1975 | 44346.79  | 9.43 |
| InaD-like protein                                                                | B4DE90 | INADL   | 49063.06  | 5.23 |
| DSP variant protein                                                              | Q4LE79 | DSP     | 267367.31 | 7.37 |
| Brefeldin A-inhibited guanine nucleotide-exchange protein 2                      | Q9Y6D5 | ARFGEF2 | 204418.08 | 6.28 |
| cDNA, FLJ93596, highly similar to Homo sapiens sulfide<br>quinone reductase-like | B2R7T6 |         | 50198.89  | 9.45 |

---

Table S3. Downregulated expression of proteins in U87 cells after TMZ treatment

| <b>Protein</b>                                                                                                 | <b>Accession number</b> | <b>Gene name</b> | <b>MW</b> | <b>PI</b> |
|----------------------------------------------------------------------------------------------------------------|-------------------------|------------------|-----------|-----------|
| Protein FAM71F1                                                                                                | F8WC78                  | FAM71F1          | 16442.47  | 7.71      |
| Elongation factor 1-delta (Fragment)                                                                           | E9PK01                  | EEF1D            | 28917.64  | 4.64      |
| Eukaryotic translation initiation factor 3 subunit F                                                           | B4DMT5                  | EIF3F            | 33333.03  | 5.32      |
| Eukaryotic initiation factor 4A-I (Fragment)                                                                   | A8K7F6                  | EIF4A1           | 46320.67  | 5.12      |
| Stomatin-like protein 2, mitochondrial                                                                         | Q9UJZ1                  | STOML2           | 38624.24  | 7.5       |
| cDNA FLJ75549, highly similar to Homo sapiens ribosomal protein, large, P0 (RPLP0), transcript variant 1, mRNA | A8K4Z4                  | RPLP0            | 34388.88  | 5.77      |
| Eukaryotic translation initiation factor 3 subunit I                                                           | Q13347                  | EIF3I            | 36877.76  | 5.38      |
| Isoform 3 of Dystonin                                                                                          | Q03001-3                | DST              | 308958.88 | 6.24      |
| Chloride intracellular channel protein 4                                                                       | Q9Y696                  | CLIC4            | 28981.83  | 5.26      |
| Proteasome activator complex subunit 3                                                                         | P61289                  | PSME3            | 29601.6   | 5.76      |
| 6-phosphogluconolactonase                                                                                      | O95336                  | PGLS             | 27814.66  | 5.95      |
| Tubulin-specific chaperone A                                                                                   | E5RIW3                  | TBCA             | 10131.03  | 4.29      |
| Myosin light polypeptide 6                                                                                     | J3KND3                  | MYL6             | 17218.26  | 4.29      |
| Isoform 2 of Gamma-tubulin complex component 2                                                                 | Q9BSJ2-3                | TUBGCP2          | 88661.56  | 6.75      |
| REG gamma-3 variant                                                                                            | K9J957                  | PSME3            | 26964.19  | 5.74      |
| Heterogeneous nuclear ribonucleoprotein H                                                                      | G8JLB6                  | HNRNPH1          | 51482.28  | 6.8       |
| Putative uncharacterized protein DKFZp686A15170 (Fragment)                                                     | Q68DG4                  | DKFZp686A15170   | 21607.09  | 7.68      |
| Isoform Short of Adenomatous polyposis coli protein                                                            | P25054-2                | APC              | 302307.96 | 7.82      |

### supplement figure legends

**Fig. S1.** Effects of temozolomide on regulation of viability and morphology in GBM cells. (a) This histogram showed live cell numbers of U87 and U251 cell line after culture for 1 week or 2 weeks in complete culture medium (Untreated), TMZ as a final concentrations of 200  $\mu$ M diluted by complete culture medium (TMZ) and DMSO diluted by complete culture medium (DMSO) which was used as the vehicle control for TMZ (\*\* $P < 0.01$ ) . (b) The morphology of U87 and U251 cells changed considerably after culture for 1 week or 2 weeks, in the aforementioned conditions. Images marked as “ $\times 200$ ” were the same fields to the frames in the images marked as “ $\times 100$ ” . The histogram on right showed the measurement results of length, width, square of whole cell; the square of nucleus; the length of protrusion ( $\#P > 0.05$ ; \* $P < 0.05$ ; and \*\* $P < 0.01$ ).

**Fig. S2.** Effects of temozolomide on regulation of cell cycle in GBM cells. The U87 and U251 cells were distributed in various phases throughout the cell cycle after culture in different conditions of temozolomide. The statistical analysis is shown in the right histogram ( $\#P > 0.05$  and \*\* $P < 0.01$ ).

**Fig. S3.** Cytochalasin D (CCD) increased sensitivity of U87 cells to TMZ. (a) After culturing U87 cells with TMZ/DMSO/complete culture medium (Untreated)/CCB/CCD/nocodazole only and/or correlation of two of them for 1 week or 2 weeks. Cell viability and modality change was observed. Images marked as “ $\times 200$ ”

were the same fields to the frames in the images marked as “×100”. (b) The lower histogram showed the numbers of survival cells in different groups (# $P > 0.05$ ; \* $P < 0.05$ ; and \*\* $P < 0.01$ ).



**a**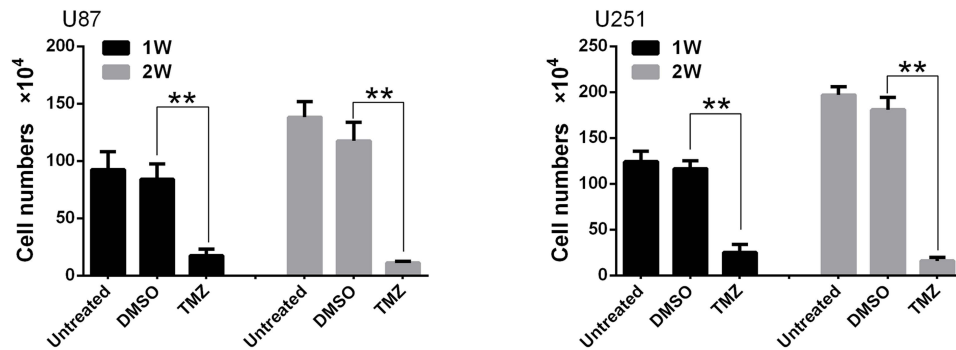**b**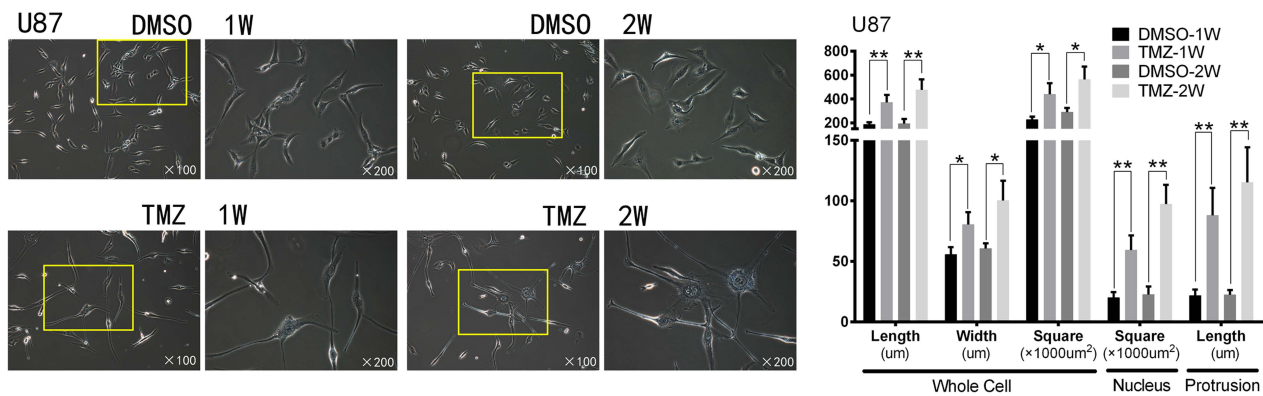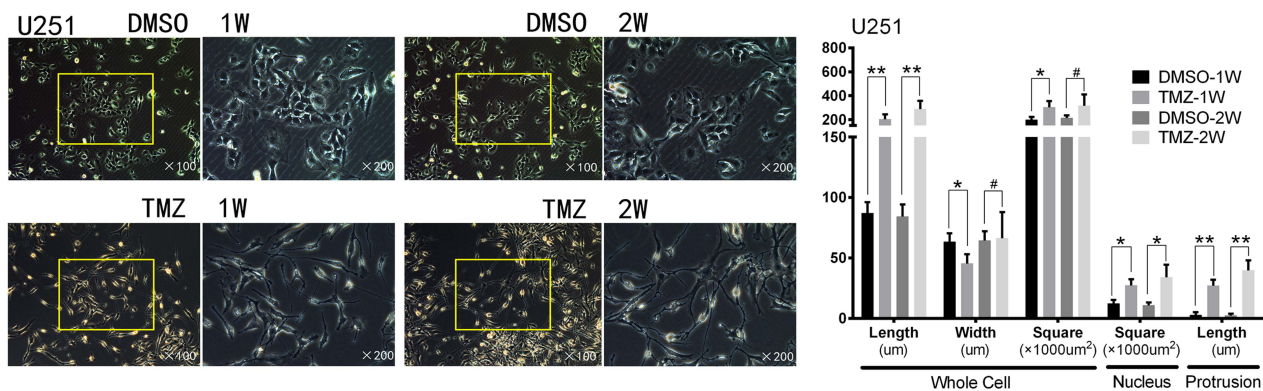

U87

Untreated

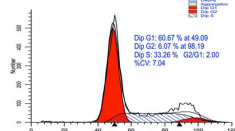

DMSO 1W

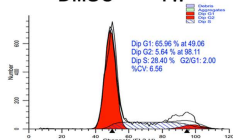

TMZ 1W

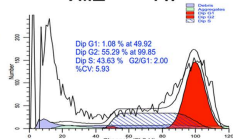

DMSO 2W

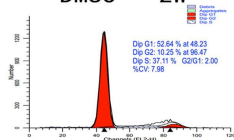

TMZ 2W

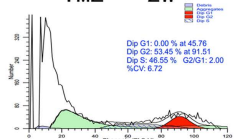

U251

Untreated

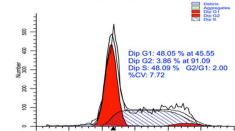

DMSO 1W

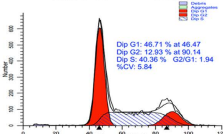

TMZ 1W

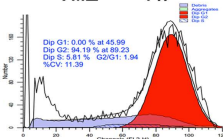

DMSO 2W

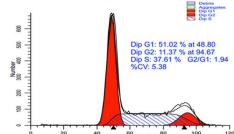

TMZ 2W

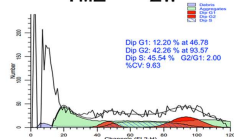

U87

Different phases  
about cell cycle(%)

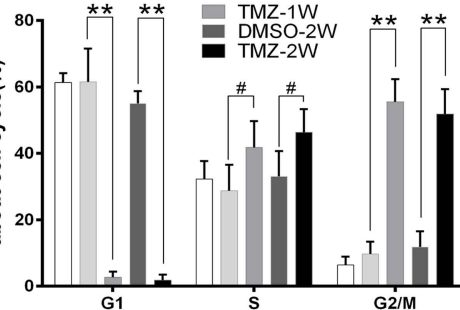

U251

Different phases  
about cell cycle(%)

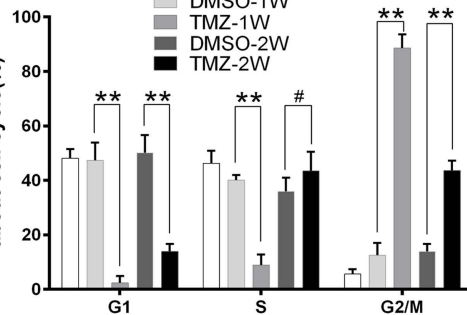

**a**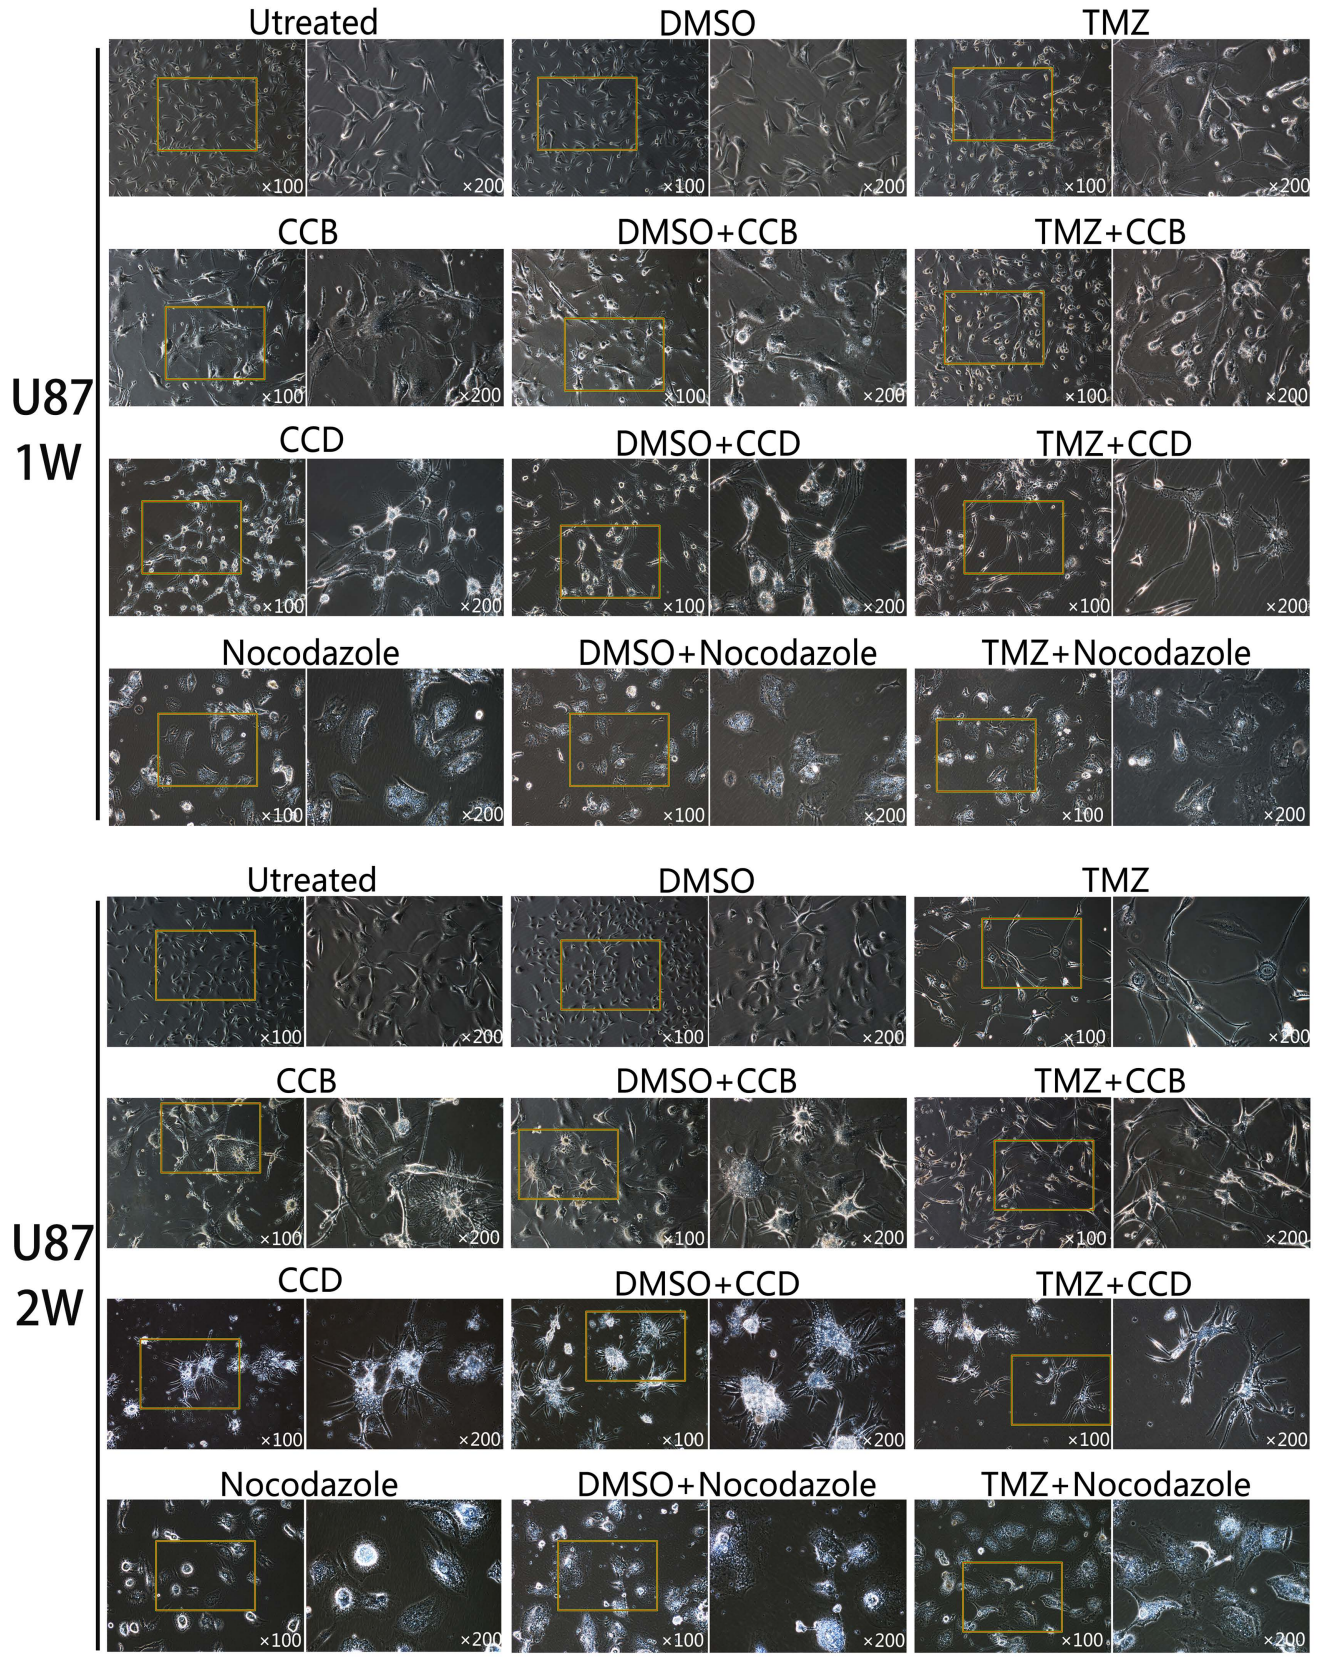**b**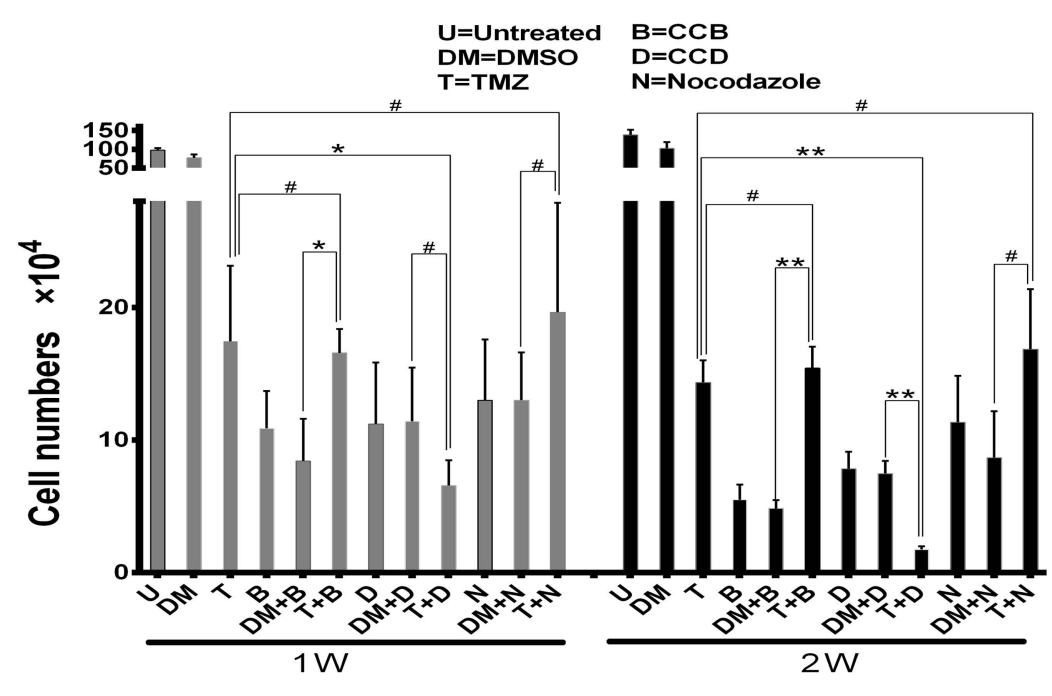

Supplement: srep28948-s1.pdf [file srep28948-s1.pdf]
